# Supplementary material
Source: PubMed Central journal article supplement (PMC3697331)
Supplement: AAC.00243-13_zac999101948so1.pdf [file AAC.00243-13_zac999101948so1.pdf]

# Supplemental Material

## **Dormancy is not necessary or sufficient for bacterial persistence**

Mehmet A Orman and Mark P Brynildsen\*

Department of Chemical and Biological Engineering, Princeton University, Princeton, New Jersey, United States of America.

\*E-mail: [mbrynild@princeton.edu](mailto:mbrynild@princeton.edu).

Running title: Persister dormancy

**Table S1. Primer list.**

| Forward primer (5'---3')                                             | Reverse primer(5'---3')                                                              | Explanation                                                                                                                                                                                                                                                                                                                                                                                                                             |
|----------------------------------------------------------------------|--------------------------------------------------------------------------------------|-----------------------------------------------------------------------------------------------------------------------------------------------------------------------------------------------------------------------------------------------------------------------------------------------------------------------------------------------------------------------------------------------------------------------------------------|
| TCTGGTGGCCGGAAGGCGAAG<br>CGGCATGCATTTACGTTGATGC<br>AGCATTACACGTCTTGA | TGCCTAATGAGTGAGCTAACTCAC<br>ATTAATTGCGTTGCGCCAAGATCC<br>GCAGTTCAACCT                 | Primers for using Datsenko and Wanner method to knock-out chromosomal <i>LacI</i> including promoter. Primers amplified <i>Kan<sup>R</sup></i> cassette from pKD4 plasmid, and have 40-nt homology regions (bold).                                                                                                                                                                                                                      |
| TCTGGTGGCCGGAAGGCGAAG<br>CGGCATGCATTTACGTTGACAC<br>CATCGAATGGTGCAAAA | TCCAGCCTACACAATCGCTCTCAC<br>TGCCCGCTTCCAGTC                                          | Primers for amplifying <i>LacI<sup>q</sup></i> gene from pQE80L plasmid (Qiagen). The forward primer has a 40-nt homology extension (bold) for up-stream sequence of chromosomal <i>LacI</i> gene, and the reverse primer has a 20-nt homology extension (bold) to append <i>Kan<sup>R</sup></i> cassette to the 3' end of <i>LacI<sup>q</sup></i> coding strand.                                                                       |
| GAGCGATTGTGTAGGCTGGA                                                 | TGCCTAATGAGTGAGCTAACTCAC<br>ATTAATTGCGTTGCGCTTAACGGC<br>TGACATGGGAAT                 | Primers for amplifying <i>Kan<sup>R</sup></i> cassette from pKD4 plasmid. Forward primer is homologous to reverse primer of <i>LacI<sup>q</sup></i> for overlap extension, and reverse primer has a 40-nt homology extension (bold) for down-stream sequence of chromosomal <i>LacI</i> gene. <i>LacI<sup>q</sup>+Kan<sup>R</sup></i> DNA fragment was chromosomally integrated in place of <i>LacI</i> using Datsenko & Wanner method. |
| ATTAATGTGAGTTAGCTCACTC<br>ATTAGGCACCCAGGCTTCTCG<br>AGAAATCATAAAAAAT  | TCCTCGCCCTTGCTCACCATAGTT<br>AATTTCTCCTTTAA                                           | Primers for amplifying <i>T5</i> promoter from pQE-80L plasmid. The forward primer has a 40-nt homology extension (bold) for up-stream sequence of <i>Lac</i> operon, and the reverse primer has a 20-nt homology extension (bold) to append <i>mCherry</i> gene to the 3' end of <i>T5p</i> coding strand.                                                                                                                             |
| ATGGTGAGCAAGGGCGAGGA                                                 | CGATCCTCATCCTGTCTCTTGATC<br>TTCTACTTGTACAGCTCGTCCATG                                 | Primers for amplifying <i>mCherry</i> gene from pAS08.3 plasmid. Forward primer is homologous to reverse primer of <i>T5p</i> (overlap extension), and reverse primer has a 23-nt homology extension (bold) to append <i>Kan<sup>R</sup></i> gene to the 3' end of <i>mCherry</i> coding strand.                                                                                                                                        |
| ATCAAGAGACAGGATGAGGAT<br>CG                                          | TGTAGATCGCTGAACTTGTAGGC<br>CTGATAAGCGCAGCGTATCAGGC<br>AATTTCAGAAGAACTCGTCAAGAA<br>GG | Primers for amplifying <i>Kan<sup>R</sup></i> gene. Forward primer is homologous to reverse primer of <i>mCherry</i> for overlap extension, and reverse primer has a homology region (bold) for down-stream sequence of chromosomal <i>Lac</i> operon. <i>T5p+mCherry+Kan<sup>R</sup></i> DNA fragment was chromosomally integrated in place of <i>Lac</i> operon using Datsenko & Wanner method.                                       |
| ATCGAATGGCGCAAAACCT                                                  | TTCCAGTCGGGAAACCTGT                                                                  | Internal primers for <i>LacI</i> to confirm the absence of duplicate gene after knocking out chromosomal <i>LacI</i> .                                                                                                                                                                                                                                                                                                                  |
| GGGATCAGGAGGAGAAGATCG                                                |                                                                                      | Forward primer for upstream sequence of the <i>LacI</i> gene. This primer and a <i>Kan<sup>R</sup></i> reverse primer (see below) were used to confirm the presence of the kanamycin resistance cassette in the proper chromosomal location.                                                                                                                                                                                            |
| AGGACAGTCGTTTGCCGTCT                                                 | ATCGACAGATTTGATCCAGCG                                                                | Internal primers for <i>LacZ</i> to confirm the absence of duplicate gene after knocking out chromosomal <i>Lac</i> operon.                                                                                                                                                                                                                                                                                                             |
| CCGATTTGGCTACATGACATC                                                | AAACAGACCAGATAAATCGTCGC                                                              | Internal primers for <i>LacY</i> to confirm the absence of duplicate gene after knocking out chromosomal <i>Lac</i> operon.                                                                                                                                                                                                                                                                                                             |
| GCCAATGACCGAAAGAATAAGA                                               | GAAATAATAGTGCTTATCCCGGTC                                                             | Internal primers for <i>LacA</i> to confirm the absence of duplicate gene after knocking out chromosomal <i>Lac</i> operon.                                                                                                                                                                                                                                                                                                             |
| CGGTAGTGGGATACGACGATAC                                               |                                                                                      | Forward primer for upstream sequence of the <i>Lac</i> operon. This primer and <i>Kan<sup>R</sup></i> or <i>mCherry</i> reverse primer were used to confirm the presence of the kanamycin resistance cassette or <i>mCherry</i> gene in the proper chromosomal location.                                                                                                                                                                |
|                                                                      | ATGATGGATACTTTCTCGGCAGGAG                                                            | <i>Kan<sup>R</sup></i> reverse primer                                                                                                                                                                                                                                                                                                                                                                                                   |

**Table S2. Persister Frequencies.**

| <b>Persister frequencies of mCherry expressing cells</b>             |                     |                     |
|----------------------------------------------------------------------|---------------------|---------------------|
|                                                                      | <b>Ampicillin</b>   | <b>Ofloxacin</b>    |
| <b>A*</b>                                                            | 4.47E-05 ± 1.17E-05 | 6.93E-05 ± 9.33E-06 |
| <b>B*</b>                                                            | 5.80E-05 ± 1.59E-05 | 9.60E-05 ± 1.33E-05 |
| <b>C*</b>                                                            | 4.27E-03 ± 4.81E-04 | 7.40E-03 ± 6.43E-04 |
| <b>Persister frequencies of RSG stained cells</b>                    |                     |                     |
| <b>A</b>                                                             | 7.19E-04 ± 1.55E-04 | 1.52E-03 ± 1.03E-04 |
| <b>B</b>                                                             | 2.05E-05 ± 4.99E-06 | 5.00E-05 ± 8.29E-06 |
| <b>C</b>                                                             | 2.00E-05 ± 4.24E-06 | 3.80E-05 ± 1.17E-05 |
| <b>D</b>                                                             | 2.30E-05 ± 7.14E-06 | 3.65E-05 ± 6.95E-06 |
| <b>Persister frequencies of RSG stained-mCherry expressing cells</b> |                     |                     |
| <b>NGI</b>                                                           | 3.93E-03 ± 3.33E-04 | 7.40E-03 ± 5.77E-04 |
| <b>NGII</b>                                                          | 3.67E-03 ± 7.51E-04 | 5.07E-03 ± 8.11E-04 |
| <b>GI</b>                                                            | 6.93E-05 ± 1.57E-05 | 9.93E-05 ± 1.64E-05 |
| <b>GII</b>                                                           | 5.33E-05 ± 9.96E-06 | 9.53E-05 ± 1.34E-05 |

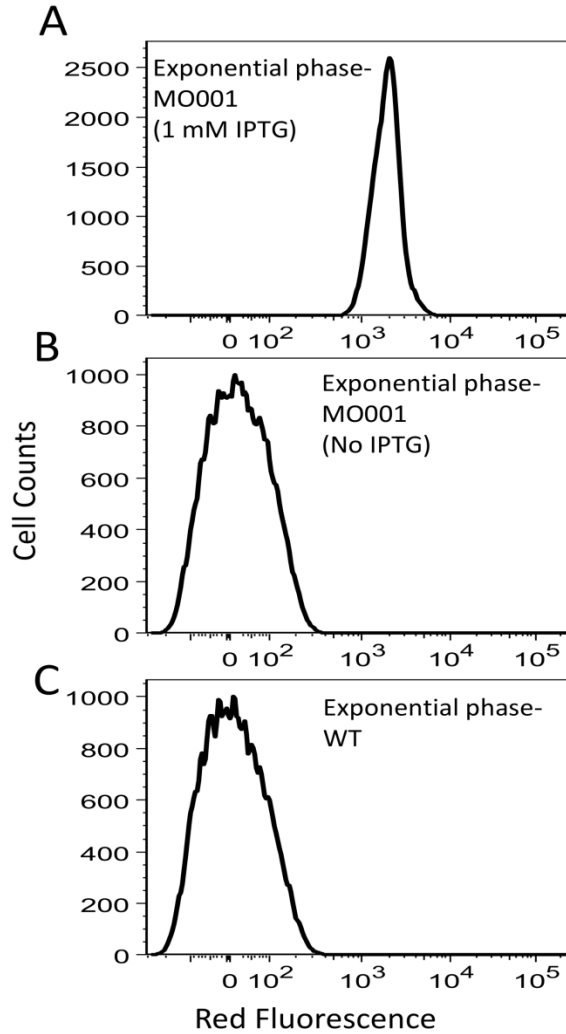

**Figure S1. MO001 background fluorescence is as low as that of the parent strain (without *mCherry*).** MO001 was incubated without IPTG during the overnight and both with and without IPTG during the exponential growth (A, B), and fluorescence intensities were measured by flow cytometry. Exponential wild-type cells were used to determine the background fluorescence (C).

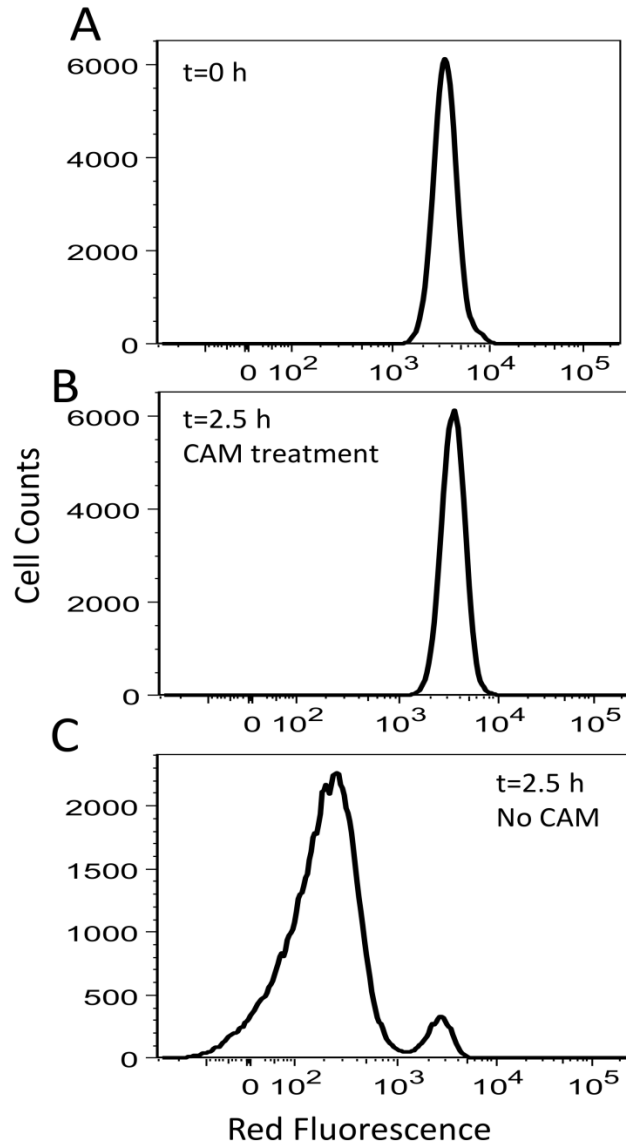

**Figure S2. mCherry was not degraded during the time-frame of the experiment.** After accumulation of mCherry protein during the overnight culture (t=0 h) (A), cells were inoculated in fresh media (without IPTG) with 50 $\mu$ g/mL chloramphenicol (B) or without chloramphenicol (C). Exponential-phase samples (2.5 h after the inoculation) were analyzed by flow cytometry.

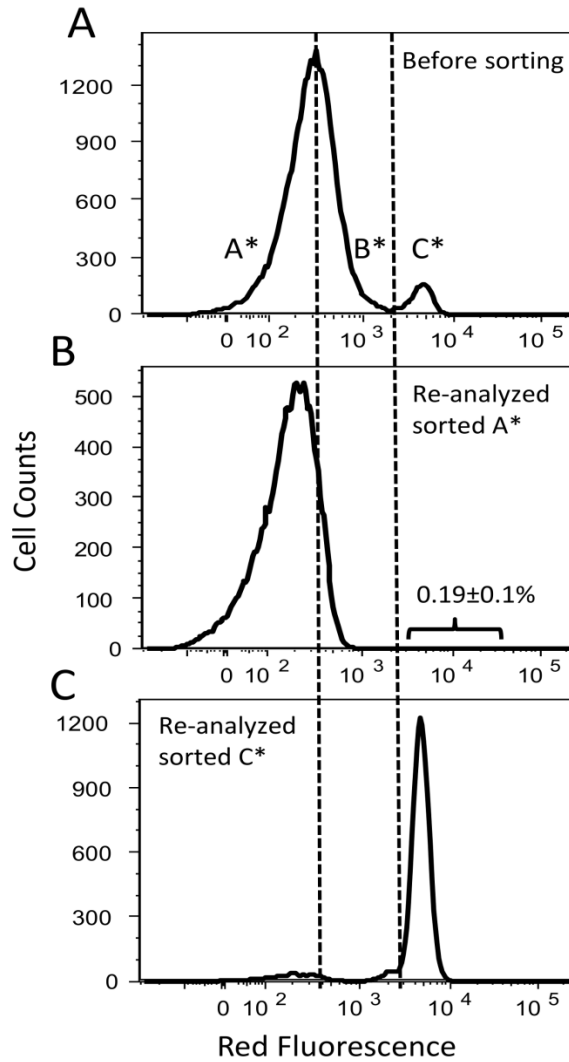

**Figure S3. The number of non-growing cells that were improperly sorted into the fastest-growing quantile was measured.** After sorting approximately  $5 \times 10^5$  cells from the A\* or C\* regions (A), the cells from A\* and C\* were separately reanalyzed by the same sorter (B and C, respectively). It was found that  $0.19 \pm 0.1\%$  of cells in A\* were non-growing cells.

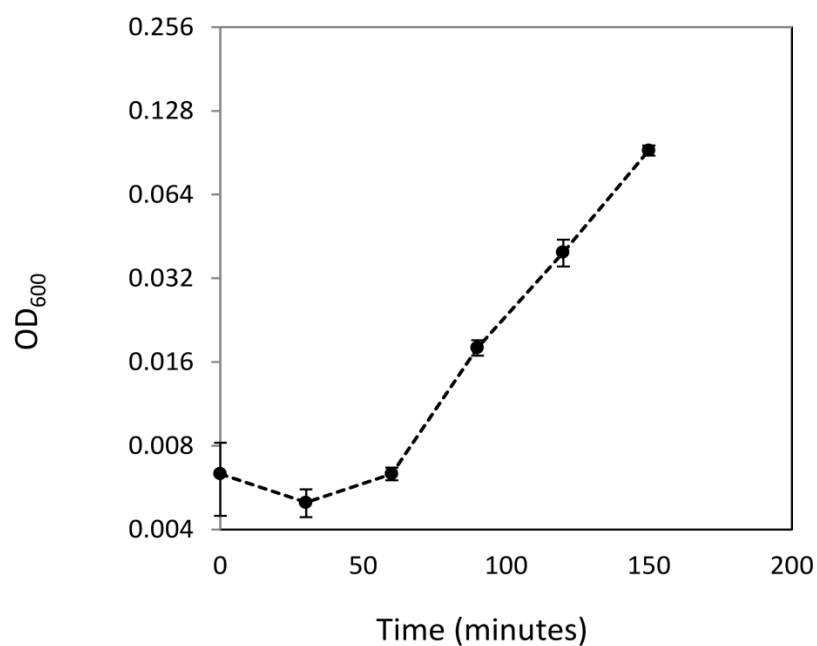

**Figure S4. Growth of MO001 cells.** After inoculation of overnight culture in fresh media (1:1000), OD<sub>600</sub> was monitored every 30 minutes, and the growth rate was calculated using exponential fit between 60 to 150 minutes time points.
